# Supplementary material
Source: PubMed Central journal article supplement (PMC1283842)

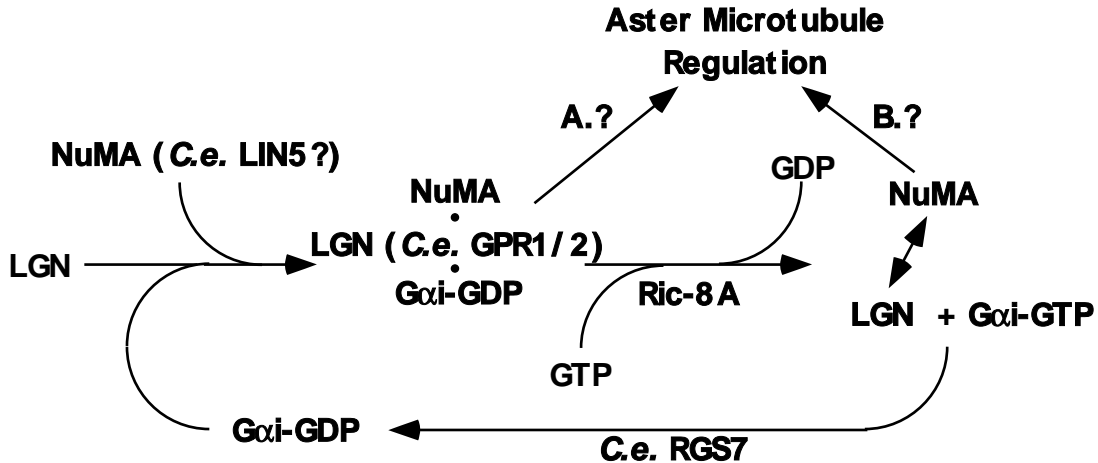

Supplement: pnas_0508306102_1.pdf [file pnas_0508306102_1.pdf]
